# Supplementary material
Source: bioRxiv or medRxiv preprint supplement (http://medrxiv.stage.highwire.org/highwire/filestream/91892/field_highwire_adjunct_files/1/2020.07.31.20165654-10.pdf)
Supplement: Supplementary file [file 2020.07.31.20165654-10.pdf]

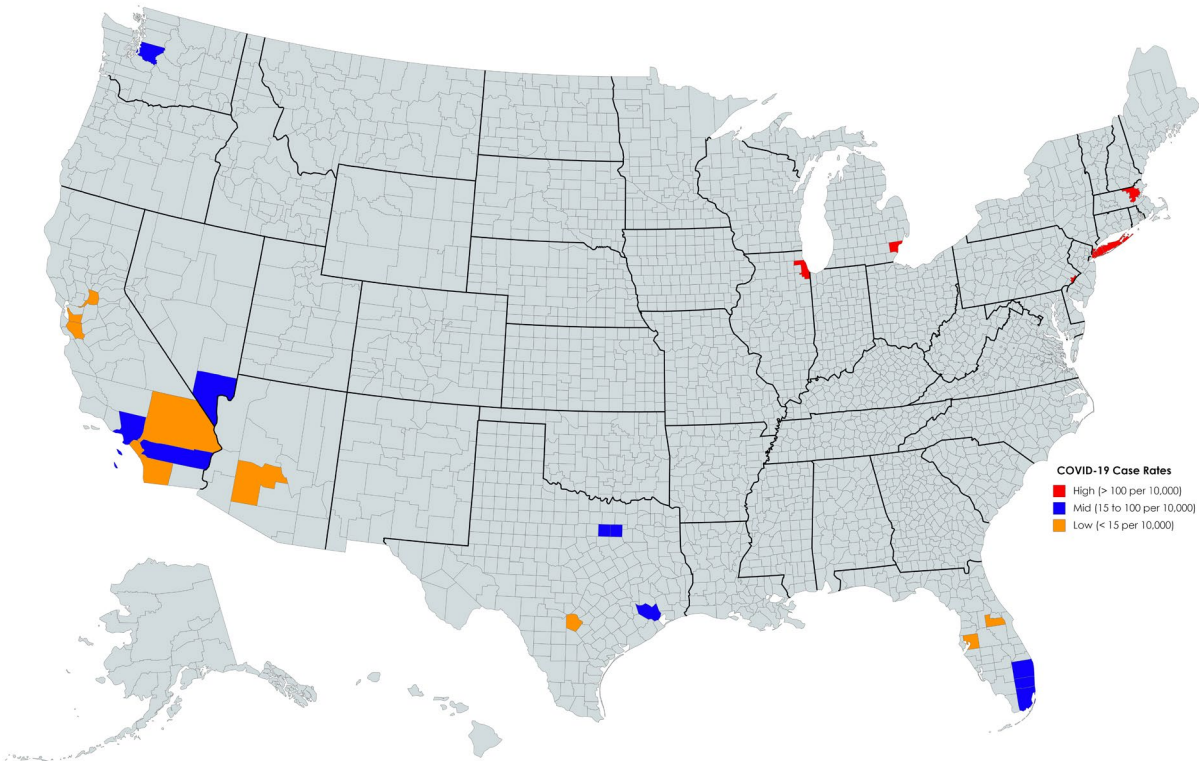

**Supplemental Figure 1. The 30 United States (US) counties included in the study and their COVID-19 case rates.** The 30 most populous counties in the US were included in this study. These counties were divided into three groups (high, mid, and low) based on their COVID-19 case rates on May 10th, 2020. High group with case rates of  $> 100$  per 10,000, mid group with case rates of 15 to 100 per 10,000, and low group with case rates  $< 15$  per 10,000. The counties included in the high, mid, and low groups are listed in Table 1. The US map was generated using the tools provided by Map Chart (<https://mapchart.net/usa-counties.html>).
